# Supplementary material
Source: publisher site journal article supplement (https://www.dovepress.com/article/400071)
Supplement: Supplementary file 1 [file get_supplementary_file.php]

**Supplementary figure**

***Supplementary Figure 1:*** *Frequency of features from the bootstrap aggregation.* 1000-fold bootstrap samples resulted in the best 3 variables.

“MDTfu_9m”: presence of multidisciplinary team meeting (follow-up) 9 months after diagnosis, “CT_five”: CT scan of more than 5 times a year, “Death_BC”: Death due to breast cancer, “Path_stage”: pathological stage, “Clin_stage”: clinical stage, “L01_anycode”: presence of any L01 chemotherapy code, “L01_count”: count of any L01 chemotherapy code, “ORGREC_3m”: original pathology record 3 months after diagnosis, “CA153-count”: count of test for CA15-3 tumor marker, “Comb_stage”: combined clinical and pathological stage, “Surgery_3m”: surgery 3 months after diagnosis, “RT_9m”: radiotherapy 9 months after diagnosis, “Hormo_count”: count of anti-hormone therapy, “CA153_year”: maximum number of test for CA15-3 marker counts per year, “Systemic_count”: count of systemic therapy, “L01_interval”: interval of 2 years between any L01 chemotherapy code, “APO_3m”: anatomical-pathological report 3 months after diagnosis, “Death_5y”: Date of death within 5 years after diagnosis, “RT_count_9m”: count of radiotherapy codes 9 months after diagnosis, “CT_year”: maximum number of CT scan counts per year, “RT_interval”: interval of 2 years between any radiotherapy code, “Chem_proc”: presence of chemotherapy administration procedures (IMA data), “Chem_line_interval”: interval of 4 months between chemotherapy agents given in the first line of treatment, “Targeted_9m”: presence of any targeted agent 9 months after diagnosis, “Chem_encounter”: presence of chemotherapy administration procedures (MZG data), “MDTfirst_9m”: presence of a first MDT meeting 9 months after diagnosis, “MDTall_9m”: presence of any MDT meeting 9 months after diagnosis, “Imaging_9m”: any type of imaging 9 months after diagnosis.

**Supplementary table**

***Supplementary table 1:*** *Performance of external validation set, tested in 2 different age categories (>70 or ≤70 years old)*

|  | **TP** | **TN** | **FN** | **FP** | **Sensitivity, %** | **Specificity, %** | **PPV, %** | **NPV, %** | **Accuracy, %** |
| --- | --- | --- | --- | --- | --- | --- | --- | --- | --- |
| **>70 years old**  **(N=189)** | 22 | 153 | 7 | 7 | 75.9% | 95.6% | 75.9% | 95.6% | 92.6% |
| **≤ 70 years old (N=630)** | 47 | 571 | 6 | 6 | 88.7% | 99.0% | 88.7% | 99.0% | 98.1% |

**Appendix 1: information on data sources and data used**

IMA (InterMutualistic Agency) is an association collecting reimbursement data from all health insurance companies in Belgium. Claims data from IMA includes diagnostic and therapeutic procedures and medication as ATC numbers (Anatomical Therapeutic Chemical classification from WHO, 2013) 1. Hospital discharge data was collected from the ‘Minimale Ziekenhuis Gegevens’ or MZG database. Hospital discharge data includes codes from the ninth and tenth revision of the international classification and diseases (ICD-9 and-10), which was considered complete from 1 January 2008. There was a switch from ICD-9 to ICD-10 codes in 2015, which hampered registrations of hospital discharge data of that year 2,3. The vital status of patients was obtained from linkage with the Belgian Crossroads Bank for Social Security (CBSS) using the patients’ social security number 4. Information on cause of death was collected from ‘Agentschap Zorg en Gezondheid’ for the region of Flanders 5, ‘Observatoire de la Santé et du Social de Bruxelles-Capitale’ for Brussels 6, and ‘Agence pour une Vie de Qualité - AVIQ’ for Wallonia 7. Classic registration data includes information from the oncological care programs and pathological anatomy laboratories 8.

1. WHO Collaborating Centre for Drug Statistics Methodology, Guidelines for ATC classification and DDD assignment 2013. Oslo. (2012).

2. International classification of diseases : [‎9th]‎ ninth revision, basic tabulation list with alphabetic index. Available at: https://apps.who.int/iris/handle/10665/39473. (Accessed: 7th June 2022)

3. ICD-10 : international statistical classification of diseases and related health problems : tenth revision. Available at: https://apps.who.int/iris/handle/10665/42980. (Accessed: 7th June 2022)

4. CBSS - Crossroads Bank for Social Security. Available at: https://www.ksz-bcss.fgov.be/nl/documents-list. (Accessed: 18th February 2020)

5. Agentschap Zorg en Gezondheid. (2017). Available at: http://www.zorg-en-gezondheid.be/cijfers/. (Accessed: 18th February 2020)

6. Observatoire de la Santé et du Social de Bruxelles-Capitale. Available at: https://www.ccc-ggc.brussels/nl/observatbru/indicatoren/mortaliteitsindicatoren.

7. Agence pour une Vie de Qualité (AViQ).

8. Cancer Burden in Belgium 2004-2017, Belgian Cancer Registry, Brussels. (2020). Available at: https://kankerregister.org/Publications. (Accessed: 18th February 2020)

**Appendix 2: code groups**

**IMA code groups**

Diagnosis/imaging

| Variable | Nomenclature Codes from nomensoft |
| --- | --- |
| Multidisciplinary Team meeting (MDT) follow-up | 350232  350254 350265  350276 350280  350291 350302 |
| MDT first | 350372 350383 |
| MDT (any) | Follow-up:  350232  350254 350265  350276 350280  350291 350302  First:  350372 350383  Participation:  350394 350405  350416 350420  350151 350162  350173 350184  350711 350722  350733 350744 |
| Test for CA15-3 marker | 548310 548321 |
| Histopathological test | 588011 588022  588114 588125  588254 588265  588276 588280  588291 588302 |
| CT scan | PET-CT:  459874 459885  459896 459900  459911 459922  PET mamma carcinoma:  442595 442606  442971 442982  CT body:  458813 458824  458533 458544  459550 459561  459572 459583  459594 459605  459616 459620  459631 459642  458474 458485  458496 458500  CT brain:  458673 458684  458732 458743  458511 458522  459955 459966  SPECT-CT:  459351 459362  459373 459384  442455 442466  442514 442525 |
| MR | Breast:  459476 459480  459830 459841  459421 459410  459395 459406 |
| Imaging any | CT:  459874 459885  459896 459900  459911 459922  442595 442606  442971 442982  458813 458824  458533 458544  459550 459561  459572 459583  459594 459605  459616 459620  459631 459642  458474 458485  458496 458500  458673 458684  458732 458743  458511 458522  459955 459966  459351 459362  459373 459384  442455 442466  442514 442525  MR:  459476 459480  459830 459841  459421 459410  459395 459406  RX:  Thorax:  452690 452701  452712 452723  463691 463702  463713 463724  455335 455346  Skeleton:  455070 455081  455114 455125  455136 455140  455210 455221  455232 455243  455254 455265  455276 455280  455394 455405  455416 455420  455335 455346  455475 455486  455534 455545  455814 455825  455836 455840  455851 455862  455873 455884  466071 466082  466115 466126  466130 466141  466211 466222  466233 466244  466255 466266  466270 466281  466292 466303  466314 466325  466336 466340  466395 466406  466410 466421  466476 466480  466535 466546  Diagnostic mammo:  450096 450100  461090 461101  Echo:  Breast:  459793 459804  460132 460143  469394 469405  461134 461145  Abdominal:  460213 460224  460935 460946  459712 459723  459793 459804  460154 460165  469416 469420  469173 469184  Other abdominal:  460176 460180  469431 469442  460191 460202  460913 460924  469453 469464 |

Treatment

| Variable | Nomenclature Codes/ATC codes |
| --- | --- |
| Radiotherapy | 444113 444124  444135 444146  444150 444161  444172 444183  444710 444721  444290 444301  444312 444323  444216 444220  444253 444264 |
| Anticancer agents (ATC) | L01XE07 Lapatinib  L01XC13 Pertuzumab  L01XX41 Erubilin  L01DB01 Doxorubicin  L02BA03 Fulvestrant  L01CA04 Navelbine  L01BC06 Xeloda  M05BX04 Xgeva  M05BA08 Zometa  L01BC05 Gemcitabine  L01XA02 Carboplatinum  L01XC03 Trastuzumab  L01XC14 Trastuzumab-emtansine (T-DM1)  L01XC07 Bevacizumab  L01XE07 Lapatinib  L01XE10 Everolimus  L01XE33 Palbociclib  L01XE42 Ribociclib  L01XE50 Abemaciclib |
| Endocrine therapy (ATC) | L02BA01 Tamoxifen  L02BA02 Toremifene  G03XC01 Raloxifen  L02BA03 Fulvestrant  L02BG03 Anastrozole  L02BG04 Letrozole  L02BG06 Exemestane  L02AE03 Goserelin  L02AB01 Megestrol  G03AC05 Megestrol acetate |
| Surgery | 227032 227043  227054 227065  227732 227743  227754 227765  227776 227780  227791 227802  227813 227824  227835 227846  226951 226962  226973 226984  226995 227006  227010 227021  227894 227905  227636 227640  227651 227662  227673 227684  227695 227706  227710 227721  Lymph node surgery:  226936 226940  227592 227603  227614 227625 |

**MZG code groups**

Diagnosis

| Variable | International Classification of Diseases (ICD) codes |
| --- | --- |
| Secondary Metastatic Neoplasm (SMN) indicator | ICD-9:  1981  1982  1983  1984  1985  ICD-10:  C7931  C7932  C7951  C7952  C7981  C7982  C7989 |
| Related to chemo administration or palliative care | ICD-9:  V07  V58  V66  V67  ICD-10:  D61  D64  D70  Z51  T45 |
| Breast neoplasm | ICD-9:  V163  V8401  1750  V103  ICD-10:  C50  Z151  Z803  C44591 |
| Radiotherapy | ICD-9 :  E8792  V661  V671  V580  V58  ICD-10 :  Y842  DMY |
| Clinical trial | 9925  9928  9929 |
| MR or CT scan | ICD-9:  8892  8801  8802  8742  8741  ICD-10:  BF35  BH30  BH31  BW24  BW20  CB30 |
